# Supplementary material for: Dielectric secondary relaxation of water in aqueous binary glass-formers
Source: Royal Society of Chemistry journal article supplement (doi:10.1039/c001275k), 2010-01-01
Supplement: c001275k.pdf [file c001275k.pdf]

***Electronic Supplementary Information  
(ESI)***

**Dielectric secondary relaxation of water in aqueous binary glass-formers**

**Johan Sjöström, Johan Mattsson, Rikard Bergman, Erik Johansson, Karin Josefsson, David Svantesson, and Jan Swenson**

*Department of Applied Physics, Chalmers University of Technology, SE-41296 Göteborg, Sweden.*

**Fitting results for the dimers and trimers**

Figure 4 of the corresponding article shows the temperature dependent relaxation times for the  $\alpha$  and  $w$  relaxations, as plotted in an Arrhenius representation for aqueous PG and PGME. In this ESI we show that an analogous behaviour is found also for nPG and nPGME with  $n=2$  and 3. The  $\alpha$  and  $w$  relaxation relaxation times for aqueous 2PG and 2PGME are shown in Fig. S1 and for aqueous 3PG and 3PGME in Fig. S2, respectively. The temperature dependent  $\alpha$  relaxation times for all investigated samples are well described by VFT functions, as shown by the solid lines. At temperatures near  $T_g$ , the  $\alpha$  relaxation generally becomes faster as water is added to the glycols (2PG and 3PG). In contrast, the opposite behaviour, with a slowing down of the  $\alpha$  relaxation for increasing water content is observed for the monomethyl ethers (2PGME and 3PGME) up to a certain value of  $C_w$ , above which the  $\alpha$  relaxation speeds up. The  $\alpha$  relaxation behaviour for both the dimers and trimers are consistent with the results from calorimetry, as shown in Fig. 1 in the article. The  $w$  relaxation times exhibit Arrhenius temperature dependences in the glassy state for all samples. In marked contrast to the very different  $C_w$  behaviours of the  $\alpha$  relaxation for the glycols and monomethyl ethers, the  $w$  relaxations shift systematically towards shorter times as more water is added. Moreover, the activation energy,  $E$ , is highly similar for all systems with values within the range  $E=0.46\pm0.06$  eV.

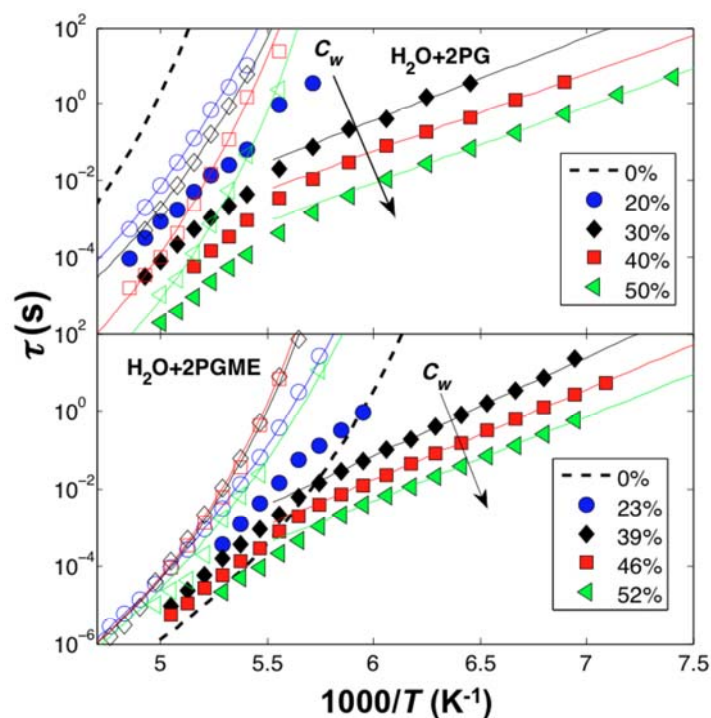

**Fig. S1.** Dielectric  $\alpha$  and  $w$  relaxation times, marked in open and closed symbols respectively, of water-2PG mixtures (top) and water-2PGME mixtures (bottom). The solid lines through the open symbols show the results of fits using a VFT expression. The relaxation times for the anhydrous samples are shown with a dashed black line. The Arrhenius fits to the  $w$  relaxation in the glassy state are shown as solid straight lines. The arrows indicate the trend of increasing water content.

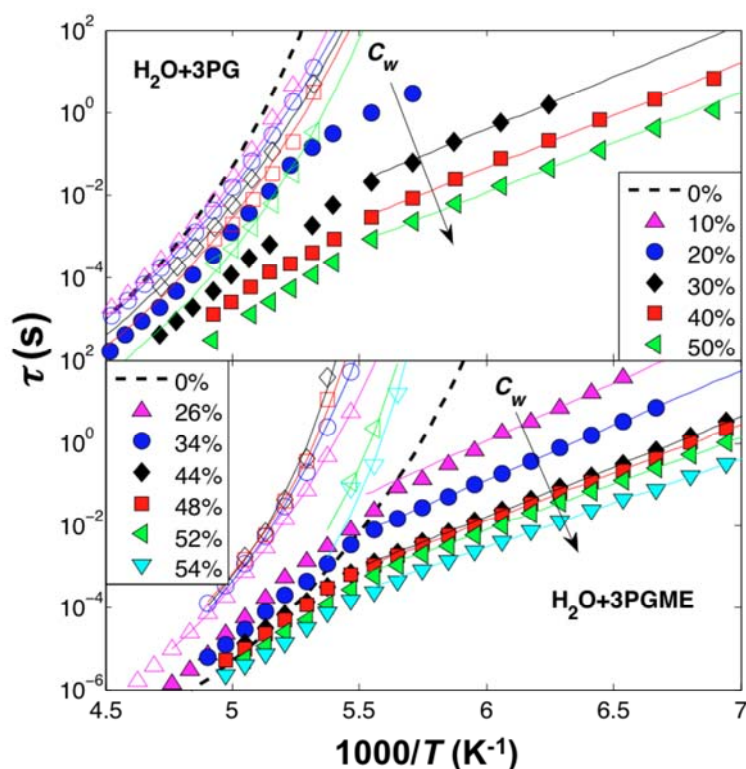

**Fig. S2.** Dielectric  $\alpha$  and  $w$  relaxation times, marked in open and closed symbols respectively, of water-3PG mixtures (top) and water-3PGME mixtures (bottom). The solid lines through the open symbols show the results of fits using a VFT expression. The relaxation times for the anhydrous samples are shown with a dashed black line. The Arrhenius fits to the  $w$  relaxation in the glassy state are shown as solid straight lines. The arrows indicate the trend of increasing water content.
